# Supplementary material for: Engineering Genetically-Encoded Mineralization and Magnetism via Directed Evolution
Source: PubMed Central journal article supplement (PMC5126674; doi:10.1038/srep38019), 2016-11-29
Supplement: srep38019-s1.pdf [file srep38019-s1.pdf]

## **Engineering Genetically-Encoded Mineralization and Magnetism via Directed Evolution**

Xueliang Liu<sup>1,2,3</sup>, Paola A. Lopez<sup>4</sup>, Tobias W. Giessen<sup>1,3</sup>, Michael Giles<sup>5</sup>, Jeffrey C. Way<sup>1,3</sup>,  
Pamela A. Silver<sup>\*1,3</sup>

<sup>1</sup> Wyss Institute for Biologically Inspired Engineering;

<sup>2</sup> School of Engineering and Applied Sciences, Harvard University;

<sup>3</sup> Department of Systems Biology, Harvard Medical School;

<sup>4</sup> Graduate Program in Bioengineering UC Berkeley/UCSF;

<sup>5</sup> Harvard College, Harvard University

### **To whom correspondence should be addressed:**

Pamela A. Silver, PhD  
Elliot T and Onie H Adams Professor of Biochemistry and Systems Biology  
Harvard Medical School  
Department of Systems Biology  
200 Longwood Avenue  
Warren Alpert Building  
Boston, MA 02115  
Phone: 617-432-6401  
Fax: 617-432-5012  
Email: [pamela\\_silver@hms.harvard.edu](mailto:pamela_silver@hms.harvard.edu)

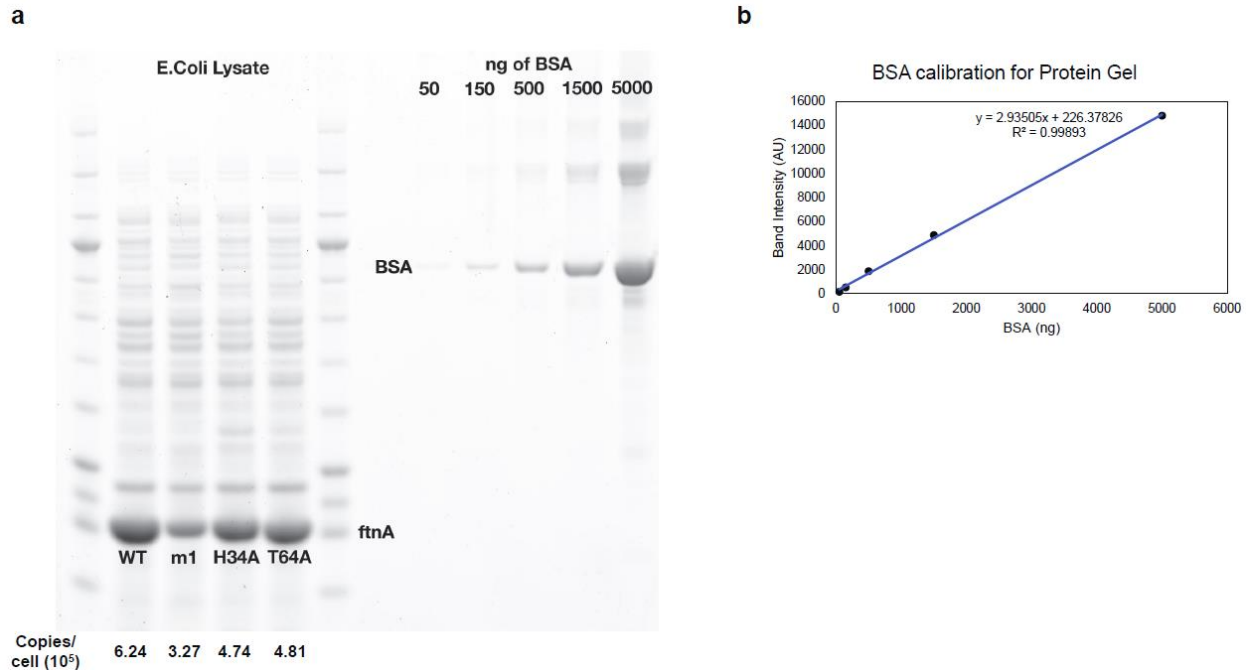

**Figure S1 BSA-calibrated SDS-PAGE gel shows lower ferritin expression level for mutants. (a)** SDS-PAGE gel of cell lysate from ferritin over-expressing E. coli shows strongest expression for wildtype (WT) compared to the more magnetic ferritin mutants. **(b)** Band intensities versus amount of BSA loaded (in ng) produces good linear fit ( $R^2 = 0.999$ ). The fit parameters were used along with culture OD and assumed  $5 \times 10^8$  cells per ml concentration at  $OD_{600} = 1$  to calculate the protein copies per cell in A.

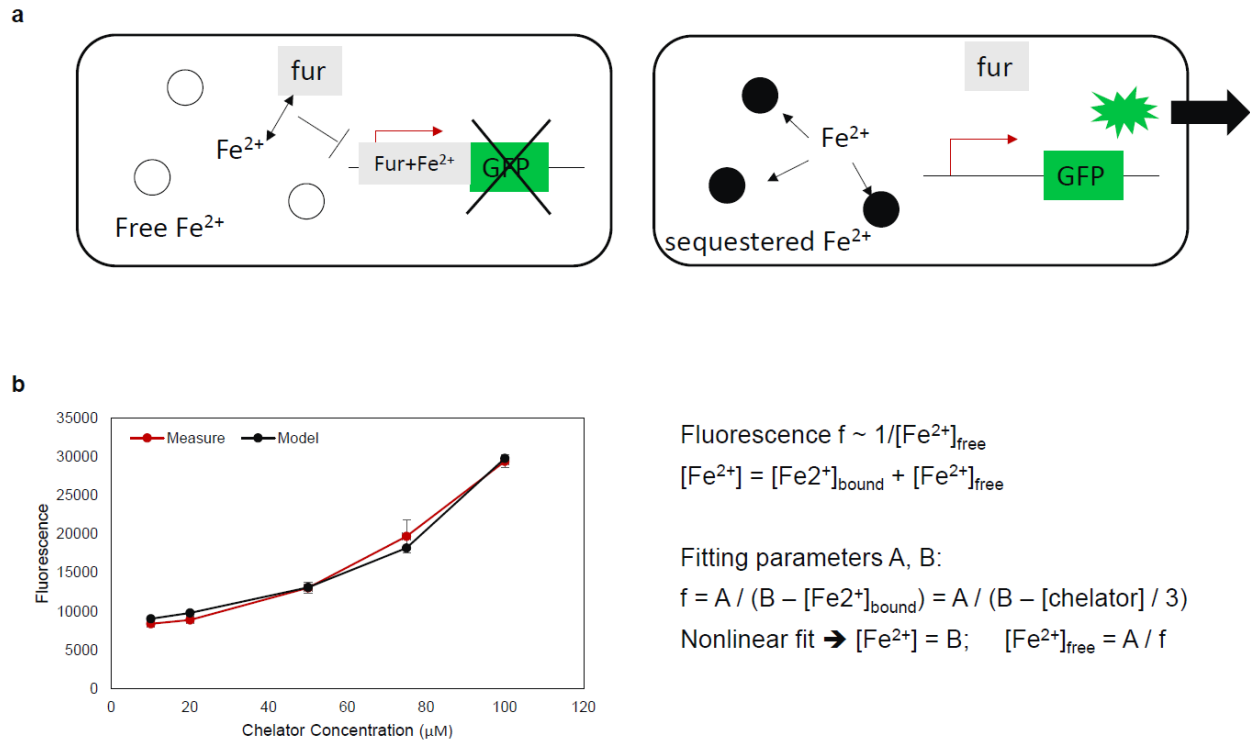

**Figure S2 Novel fluorescent genetic sensor for cytoplasmic free  $Fe^{2+}$ .** (a) Free  $Fe^{2+}$  binds to the ferric uptake regulator (apo-fur). The Fe-bound fur binds the fur promoter sequence to repress transcription of GFP (right). Sequestration of free  $Fe^{2+}$  by ferritins increases sensor fluorescence output. (b) The concentration of free  $Fe^{2+}$  can be deduced from the fluorescence signal by calibration of sensor output with titration of known concentrations of  $Fe^{2+}$  chelator bipyridine. The simple nonlinear model produces good fit to the measured fluorescence.

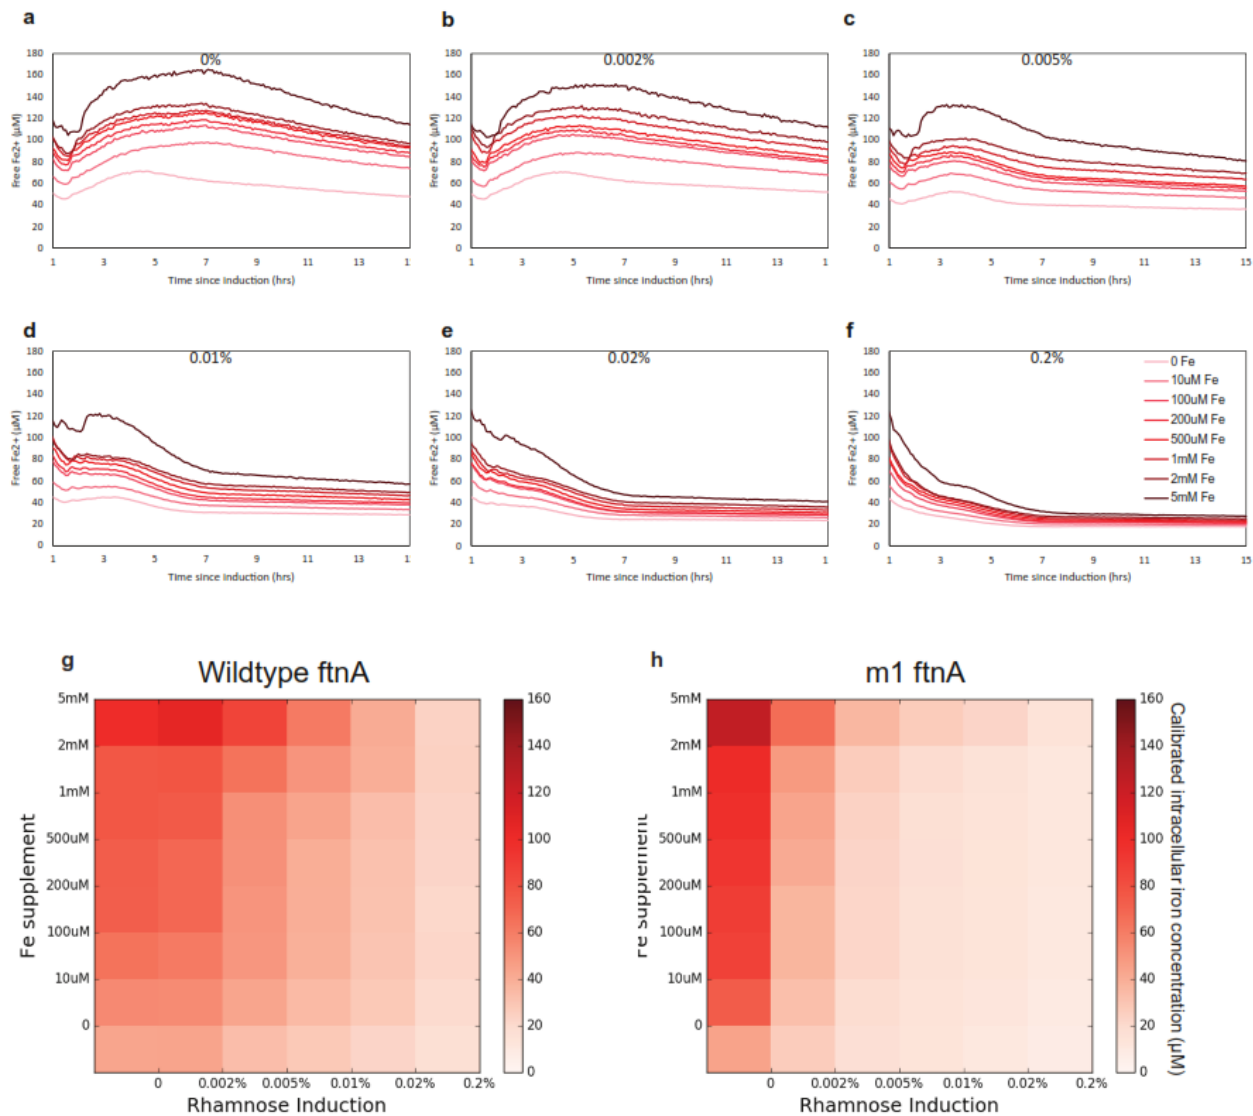

**Figure S3 Genetic fluorescent sensor monitors cellular  $\text{Fe}^{2+}$  sequestration in WT and mutant ferritin expressing cells (second replicate of data in Figure 3).** (a-f) Calibrated free  $\text{Fe}^{2+}$  concentrations in *E. coli* expressing wildtype ferritin from up to 15 hours after induction by 0% (a), 0.002% (b), 0.005% (c), 0.01% (d), 0.02% (e), and 0.2% (f) rhamnose with media  $\text{Fe}^{2+}$  supplement of 0  $\mu\text{M}$ , 10  $\mu\text{M}$ , 100  $\mu\text{M}$ , 200  $\mu\text{M}$ , 500  $\mu\text{M}$ , 1 mM, 2 mM, 5 mM. Without ferritins high media supplement at 5mM can dramatically alter the intracellular iron homeostatic setpoint. At high induction levels free  $\text{Fe}^{2+}$  is efficiently sequestered up to the highest media supplement concentration. The heatmaps with color saturation proportional to calibrated intracellular free

iron levels show that compared to the wildtype (**g**), the best ferritin mutant (**h**) is much more effective at sequestering iron at lower protein levels (0.01% rhamnose induction) and at high environmental iron concentration (up to 2 mM). This is consistent with their greater magnetism despite lower protein expression.

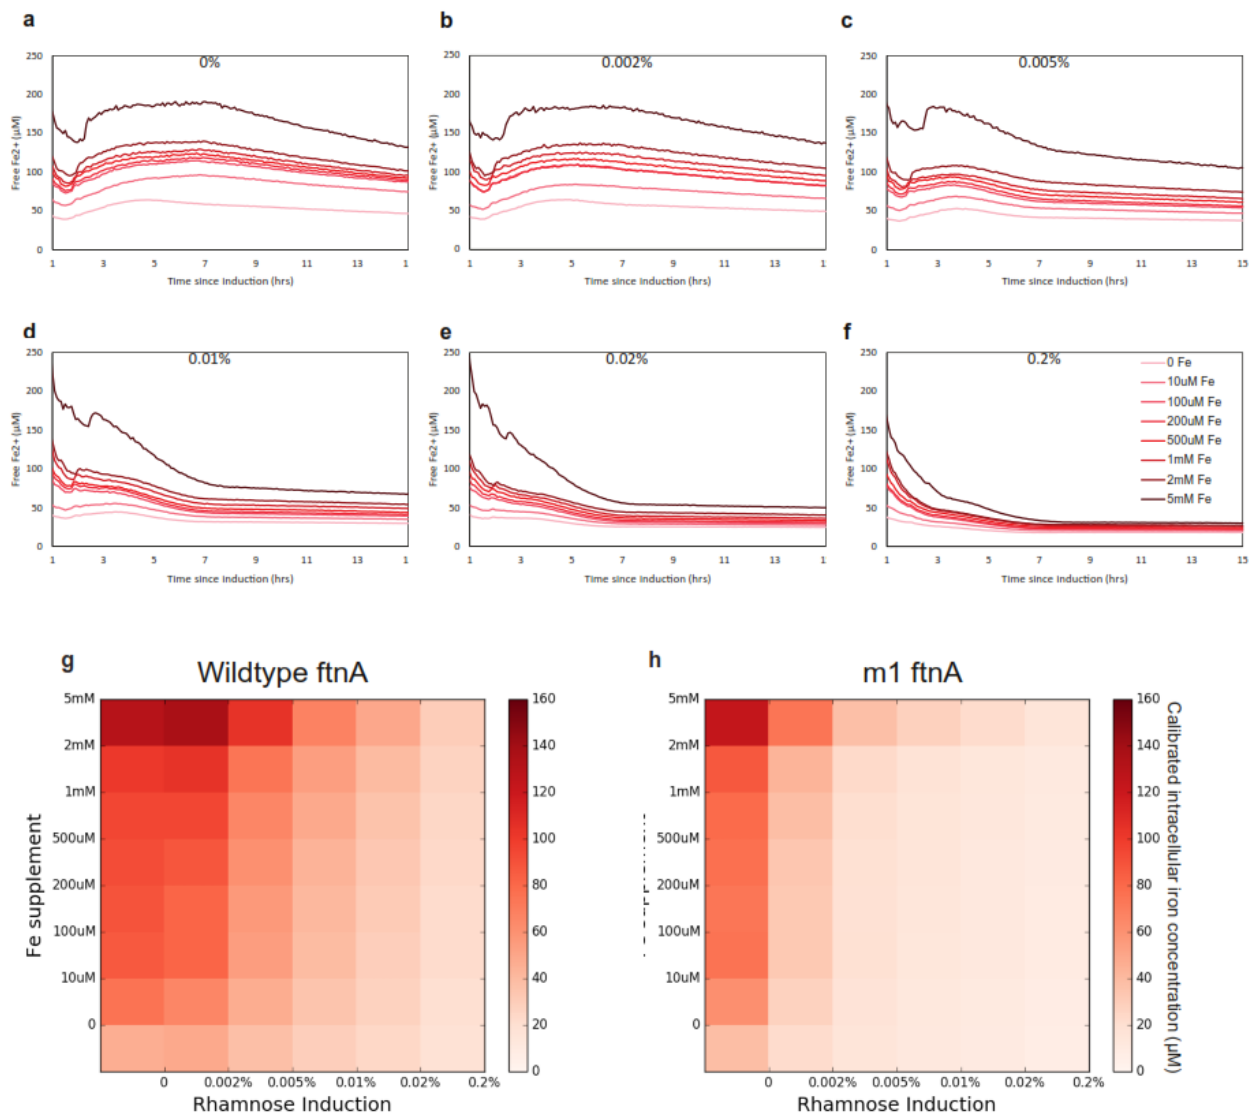

**Figure S4 Genetic fluorescent sensor monitors cellular  $\text{Fe}^{2+}$  sequestration in WT and mutant ferritin expressing cells (third replicate of data in Figure 3). (a-f) Calibrated free  $\text{Fe}^{2+}$  concentrations in *E. coli* expressing wildtype ferritin from up to 15 hours after induction by 0% (a), 0.002% (b), 0.005% (c), 0.01% (d), 0.02% (e), and 0.2% (f) rhamnose with media  $\text{Fe}^{2+}$**

supplement of 0  $\mu\text{M}$ , 10  $\mu\text{M}$ , 100  $\mu\text{M}$ , 200  $\mu\text{M}$ , 500  $\mu\text{M}$ , 1 mM, 2 mM, 5 mM. Without ferritins high media supplement at 5mM can dramatically alter the intracellular iron homeostatic setpoint. At high induction levels free  $\text{Fe}^{2+}$  is efficiently sequestered up to the highest media supplement concentration. The heatmaps with color saturation proportional to calibrated intracellular free iron levels show that compared to the wildtype (**g**), the best ferritin mutant (**h**) is much more effective at sequestering iron at lower protein levels (0.01% rhamnose induction) and at high environmental iron concentration (up to 2 mM). This is consistent with their greater magnetism despite lower protein expression.

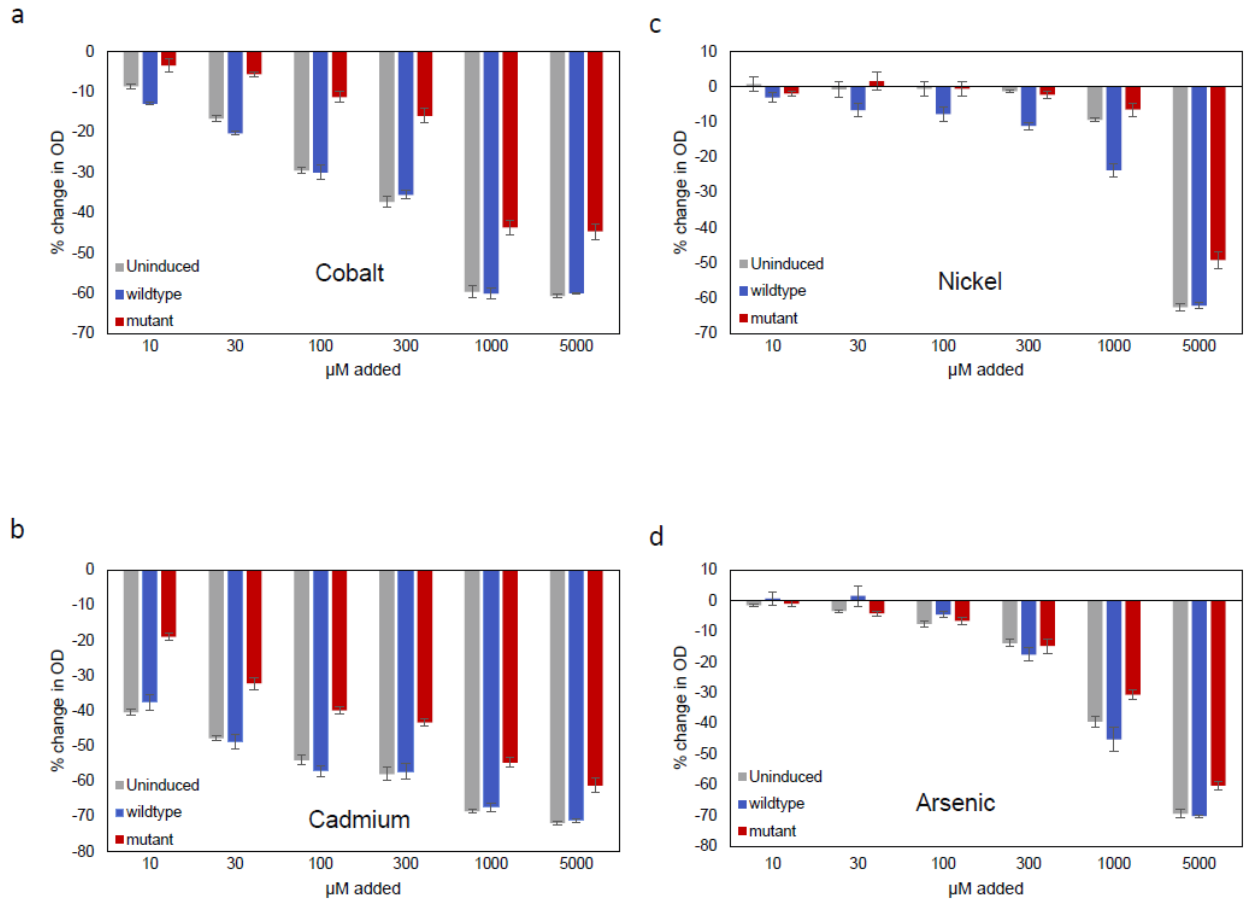

**Figure S5 Magnetic mutant ferritin over-expression reduces cellular growth defect.**

Percent change in OD was measured in early saturation phase for cells expressing no (grey), wildtype (blue) or magnetic mutant (red) ferritins and incubated in LB media containing between 0 and 5mM of cobalt (a), cadmium (b), nickel (c) and arsenic (d). Expressing the magnetic mutant ferritin exhibited the least growth defect whereas expressing no or the wildtype ferritins had similarly strong growth defect. The effect is most pronounced at low concentrations for cadmium and cobalt.

|     |                                           |
|-----|-------------------------------------------|
| m1  | H34L+T64I                                 |
| m2  | SpyTag(N-term)+R56P                       |
| m3  | F58L+T116R                                |
| m4  | SpyTag(N-term)+T64I                       |
| m5  | SpyTag(N-term)+A47T                       |
| m6  | T64I+T116R                                |
| m7  | R56P+H128R                                |
| m8  | SpyTag(N-term)+F58L                       |
| m9  | SpyTag(N-term)+H34A+T64A+F58A             |
| m10 | SpyTag(N-term)+H128R                      |
| m11 | T116R                                     |
| m12 | F58L+H128R                                |
| m13 | T64I                                      |
| m14 | T116R+H128R                               |
| m15 | T64I+H128R                                |
| m16 | H128R                                     |
| m17 | F58A                                      |
| m18 | SpyTag(N-term)                            |
| m19 | T64I+F58L                                 |
| m20 | SpyTag(N-term)+T116R                      |
| m21 | F58L                                      |
| m22 | A47T                                      |
| m23 | H34A+T64A+F58A                            |
| m24 | H128A                                     |
| m25 | R56P                                      |
| m26 | H34A                                      |
| m27 | T64A                                      |
| m28 | L18Q                                      |
| m29 | K140A                                     |
| m30 | L104Q                                     |
| m31 | R56A                                      |
| m32 | K156A                                     |
| m33 | H34A+T64A+F58A+T116R+H128R                |
| m34 | H34A+T64A+F58A+T116R                      |
| m35 | R56P+T116R                                |
| m36 | L10P                                      |
| m37 | SpyTag(N-term)+H34A+T64A+F58A+T116R+H128R |
| m38 | SpyTag(N-term)+H34A+T64A+F58A+T116R       |

**Table S1 List of ferritin mutants characterized with iron sensor and magnetic column**
